# Supplementary material for: [Ge8(Mo(CO)3)2]4−: an unprecedented 20-electron empty ten-vertex Zintl cluster
Source: Royal Society of Chemistry journal article supplement (doi:10.1039/c4cc00518j), 2014-01-01
Supplement: c4cc00518j1.pdf [file c4cc00518j1.pdf]

## Supporting Information

### $\{\text{Ge}_8([\text{Mo}(\text{CO})_3]_2)\}^{4-}$ : 20-Electron Empty Ten-vertex Zintl Anions with Two Vertices Replaced by Transition Metals

Yi Wang,<sup>ab</sup> Qian Qin,<sup>ab</sup> Jinyun Wang,<sup>a</sup> Ruili Sang,<sup>a</sup> Li Xu<sup>\*a</sup>

<sup>a</sup> State Key Laboratory of Structural Chemistry, Fujian Institute of Research on the Structure of Matter, Chinese Academy of Science, Fuzhou, Fujian, 350002, China

<sup>b</sup> Graduate School of the Chinese Academy of Sciences, Beijing 100039, China

E-mail: xli@fjirsm.ac.cn

### Experimental Section

All manipulations were carried out under argon using standard Schlenk-line and glovebox techniques. Ethylenediamine (Acros, 99%) was distilled over sodium metal and stored in a gastight Schlenk under argon in the glovebox. 18-crown-6 (1,4, 7,10, 13, 16-hexaoxacyclooctadecane, Alfa-Aesar, 99 %) was dried by refluxing over sodium metal in diethylether and recrystallized from dry n-hexanes. Toluene was dried with potassium-sodium alloy and then stored in the glovebox. Mo(CO)<sub>6</sub>(Alfa-Aesar, 98%) was used as received. Precursors(its composition can not be clearly identified. ) with nominal composition K<sub>4</sub>Ge<sub>9</sub> was synthesized by heating the corresponding mixtures of elements (K :+99 %; Ge: 99.999 %, all from Strem) at 900 °C for two days in sealed niobium containers that were jacketed in evacuated fused-silica ampoules. IR data were recorded as KBr pellets in Nujol mulls on a Magna 750 FT-IR spectrometer photometer. Electrospray mass spectra were recorded from DMF solutions of **1** with nitrogen as sheath gas flow on a Finnigan LCQ- Ion Trap Mass Spectrometer (LCQ DECA-X-30000 LCQ Deca XP) in negative-ion mode (spray voltage 4.5kV, capillary temperature 275 °C capillary voltage 15V). The samples were made up inside a glovebox under an inert atmosphere and rapidly transferred to the spectrometer in an air-tight syringe by direct infusion with a Harvard syringe pump at 15 mLmin<sup>-1</sup>.

[K(18-crown-6)]<sub>3</sub>K[Ge<sub>8</sub>(Mo(CO)<sub>3</sub>)<sub>2</sub>]•en(**1**): The binary alloy with the nominal composition “K<sub>4</sub>Ge<sub>9</sub>”(114 mg, 0.141 mmol) and 18-crown-6(151 mg, 0.571 mmol) were dissolved in 2 mL ethylenediamine (en) and stirred for 10 minutes at room temperature, resulting in a dark red solution, to which Mo(CO)<sub>6</sub>(21.7 mg, 0.0821 mmol) was added. The resulting solution was stirred for 30 minutes at room temperature and turned brownish-green. The temperature was then raised to 60 °C and kept for about 4 hours. The resulting dark brownish green solution was filtered and the filtrate was layered with toluene (8 ml). Red, transparent thin plate crystals of **1** were obtained after one week (yield, ca. 30 % based on “K<sub>4</sub>Ge<sub>9</sub>”). The IR spectrum (KBr) of **1** shows the characteristic CO stretching vibrations: 2034, 1936, 1882 and 1852 cm<sup>-1</sup>.

The quantitative energy-dispersive X-ray spectroscopy (EDX, JEOL-SEM, JSM-6700F) analysis of the crystals shows the presence of elements K, Mo, and Ge, with roughly the expected ratios.

DFT calculations were performed using the GAUSSIAN03 program package (Revision D.02)<sup>27</sup> and crystal structure parameters. All DFT calculations were carried out using the B3LYP functional, that is, Beck's hybrid three-parameter exchange functional<sup>28</sup> with the Lee-Yang-Parr correlation functional.<sup>29</sup> In these calculations, the solvent effects were taken into account by the Polarizable Continuum Model.<sup>30</sup>

### Reference

27. M. J. Frisch, G. W. Trucks, H. B. Schlegel, G. E. Scuseria, M. A. Robb, J. R. Cheeseman, J. A. Montgomery, Jr., T. Vreven, K. N. Kudin, J. C. Burant, J. M. Millam, S. S. Iyengar, J. Tomasi, V. Barone, B. Mennucci, M. Cossi, G. Scalmani, N. Rega, G. A. Petersson, H. Nakatsuji, M. Hada, M. Ehara, K.

Toyota, R. Fukuda, J. Hasegawa, M. Ishida, T. Nakajima, Y. Honda, O. Kitao, H. Nakai, M. Klene, X. Li, J. E. Knox, H. P. Hratchian, J. B. Cross, V. Bakken, C. Adamo, J. Jaramillo, R. Gomperts, R. E. Stratmann, O. Yazyev, A. J. Austin, R. Cammi, C. Pomelli, J. W. Ochterski, P. Y. Ayala, K. Morokuma, G. A. Voth, P. Salvador, J. J. Dannenberg, V. G. Zakrzewski, S. Dapprich, A. D. Daniels, M. C. Strain, O. Farkas, D. K. Malick, A. D. Rabuck, K. Raghavachari, J. B. Foresman, J. V. Ortiz, Q. Cui, A. G. Baboul, S. Clifford, J. Cioslowski, B. B. Stefanov, G. Liu, A. Liashenko, P. Piskorz, I. Komaromi, R. L. Martin, D. J. Fox, T. Keith, M. A. Al-Laham, C. Y. Peng, A. Nanayakkara, M. Challacombe, P. M. W. Gill, B. Johnson, W. Chen, M. W. Wong, C. Gonzalez, and J. A. Pople, Gaussian 03, revision D.02. Gaussian, Inc., Wallingford CT, 2004.

28. D. Becke, *J. Chem. Phys.* 1993, **98**, 5648.

29. Lee, W. Yang and R. G. Parr, *Phys. Rev. B* 1988, **37**, 785.

30. (a) M. Cossi, G. Scalmani, N. Rega and V. Barone, *J. Chem. Phys.* 2002, **117**, 43; (b) V. Barone, M. Cossi and J. Tomasi, *J. Chem. Phys.* 1997, **107**, 3210.

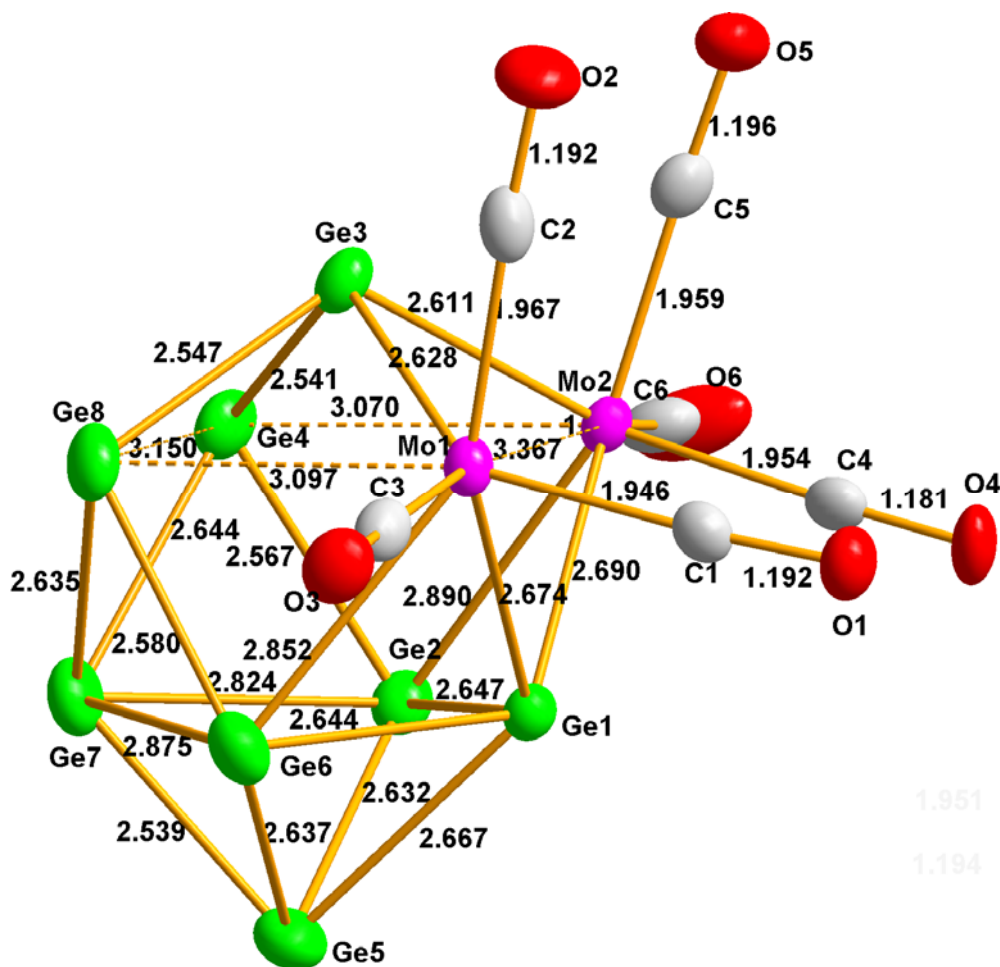

Fig. S1 ORTEP drawing of  $20e\text{-}[\text{Ge}_8(\text{Mo}(\text{CO})_3)_2]^{4+}$  (1a) of with 50% probability ellipsoids.

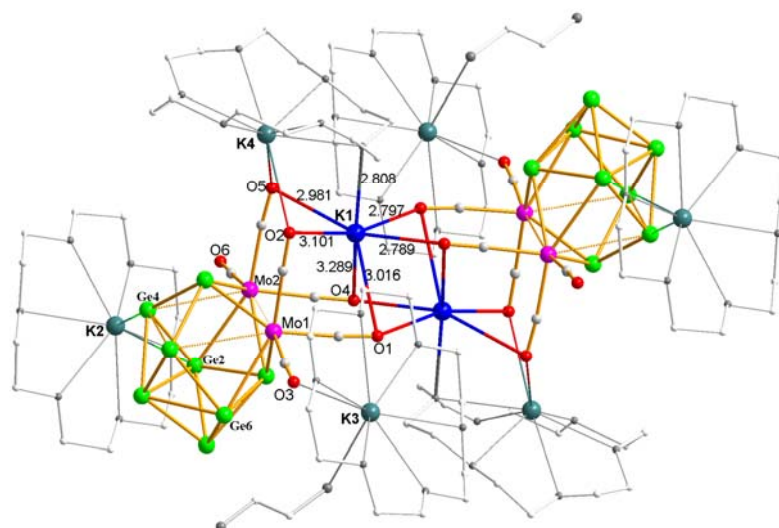

Fig. S2 Crystal structures of **1**.

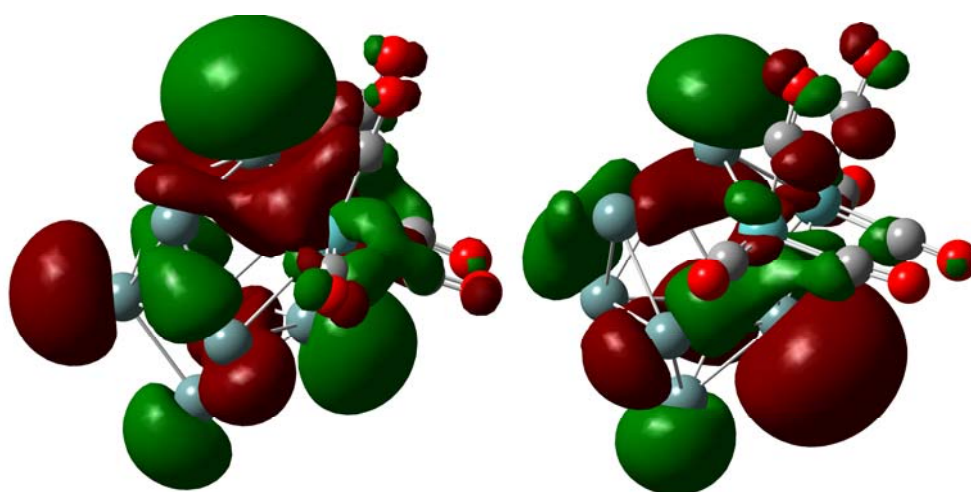

Fig.S3 LUMO of **1a**

HOMO of **1a**

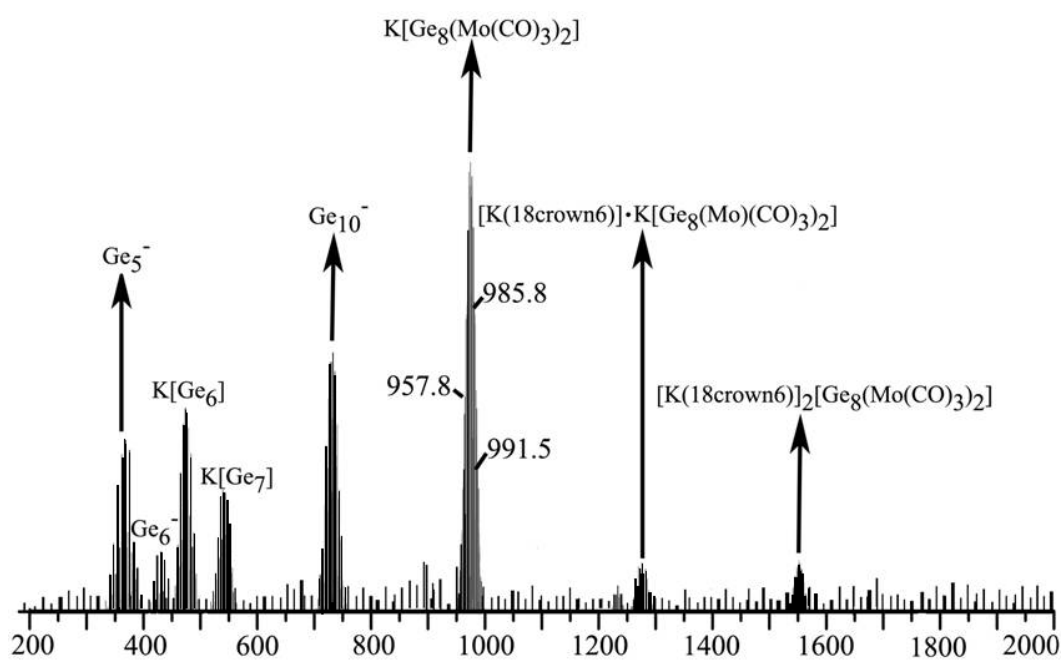

Fig. S4 Electrospray mass spectrum recorded from a DMF solution of **1**.

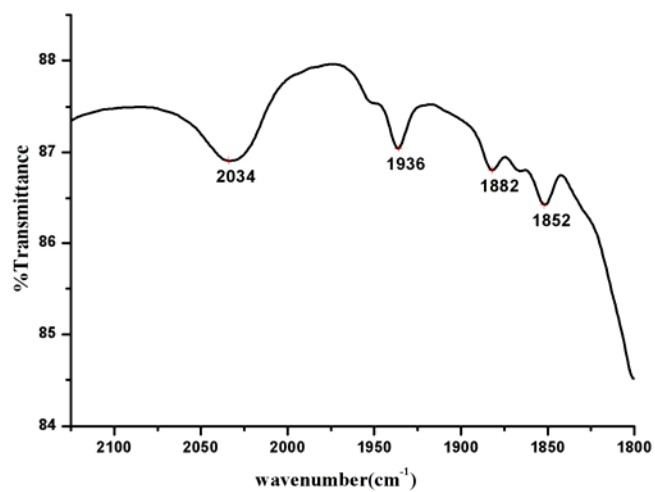

Fig. S5. IR spectrum of **1** in Nujol mulls, which cuts out the absorption of background.

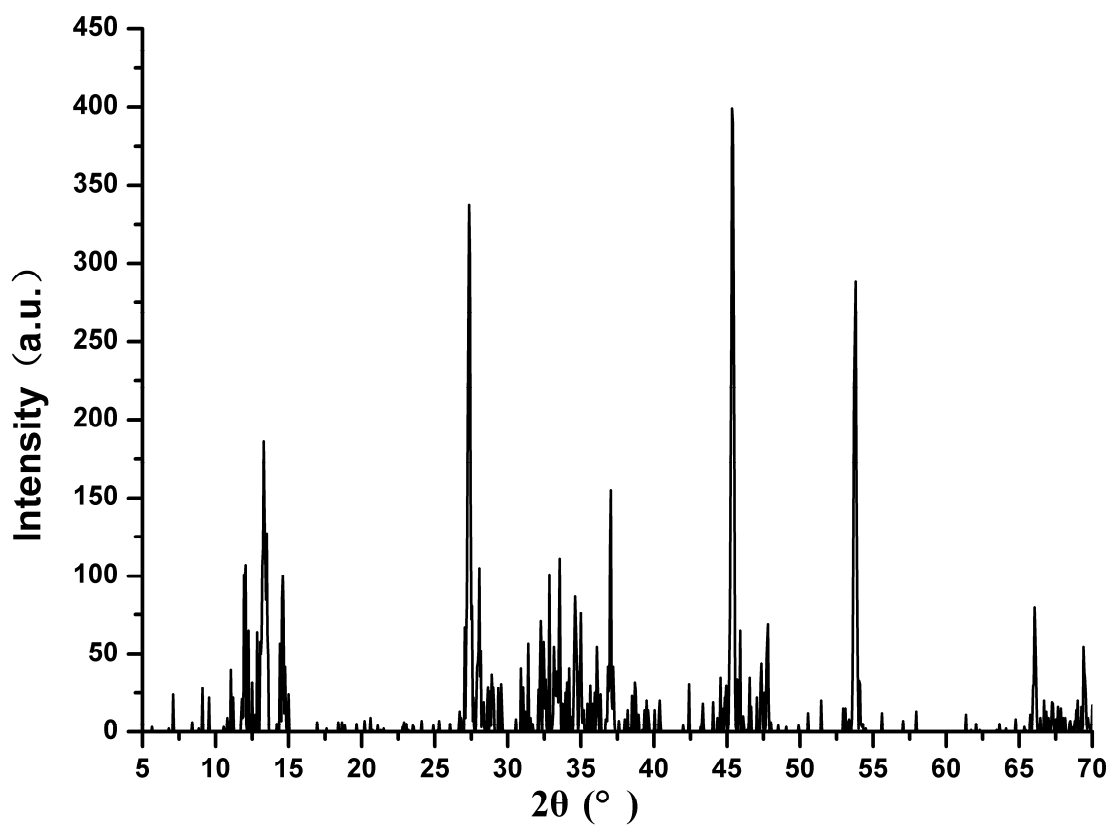

Fig. S6. PXRD of the precursor with a nominal composition “K<sub>4</sub>Ge<sub>9</sub>”.
